# Supplementary material for: Strontium vanadate-supported graphitic carbon nitride nanocomposite for simultaneous voltammetric determination of acetaminophen and levofloxacin in complex biological samples
Source: Royal Society of Chemistry journal article supplement (doi:10.1039/d1en01008e), 2022-01-01
Supplement: d1en01008e1.pdf [file d1en01008e1.pdf]

### **Supporting information**

#### **Strontium vanadate-supported graphitic carbon nitride nanocomposite for simultaneous voltammetric determination of acetaminophen and levofloxacin in complex biological samples**

Nandini Nataraj <sup>a</sup>, Shen-Ming Chen <sup>\*a</sup>, Siva Kumar Krishnan <sup>\*b</sup>

<sup>†</sup>Department of Chemical Engineering and Biotechnology, National Taipei University of Technology, No.1, Section 3, Chung-Hsiao East Road, Taipei 106, Taiwan.

<sup>‡</sup>CONACYT-Instituto de Física, Benemérita Universidad Autónoma de Puebla, Apdo. Postal J-48, Puebla 72570, Mexico.

#### **\*Corresponding author:**

S-M Chen: Email: [smchen78@ms15.hinet.net](mailto:smchen78@ms15.hinet.net), [smchen1957@gmail.com](mailto:smchen1957@gmail.com)

Siva Kumar Krishnan: Email: [sivakumar@ifuap.buap.mx](mailto:sivakumar@ifuap.buap.mx)

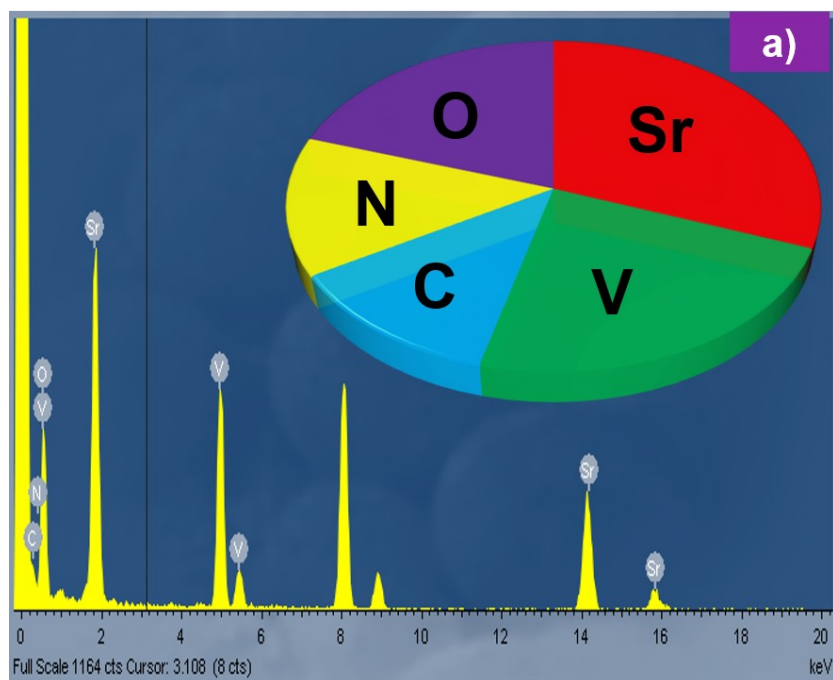

**Fig S1.** Fig S1. EDAX elemental analysis spectrum of SrV/GCN nanocomposite sample showing the peaks of Sr, V, O, C, and N respectively.

**Table S1.** Comparison of the EIS parameters of the electrodes.

| Materials   | $R_s$ ( $\Omega$ ) | $C_{dl}$ (nF) | $R_{ct}$ ( $\Omega$ ) | $Z_w$ (DW) |
|-------------|--------------------|---------------|-----------------------|------------|
| Bare GCE    | 40.4               | 339           | 328                   | 294        |
| SrV/GCE     | 36                 | 344           | 266                   | 248        |
| GCN/GCE     | 37.9               | 386           | 129                   | 316        |
| SrV/GCN/GCE | 37.4               | 450           | 83                    | 250        |

### S1. Optimization of SrV/GCN/GCE

To optimize the loading amount, the electrochemical activity was studied by varying the amount of SrV/GCN nanocomposite on the GCE surface from 1 to 12 mg/mL. The maximum current response was observed when the GC-electrode was modified with 6 mg of SrV/GCN (**Fig. S2 a**). Moreover, the concentration of SrV/GCN dispersion solution used to deposit over GCE was also optimized by varying the suspension volume from 1 to 10  $\mu$ L. The modified GC electrode with a concentration of 6  $\mu$ L SrV/GCN suspension exhibited a higher electrochemical response in comparison with the other studied concentrations (**Fig.**

**S2 b).** Therefore, the 6  $\mu\text{L}$  (6.0 mg/mL) of SrV/GCN suspension was used for electrochemical detection studies.

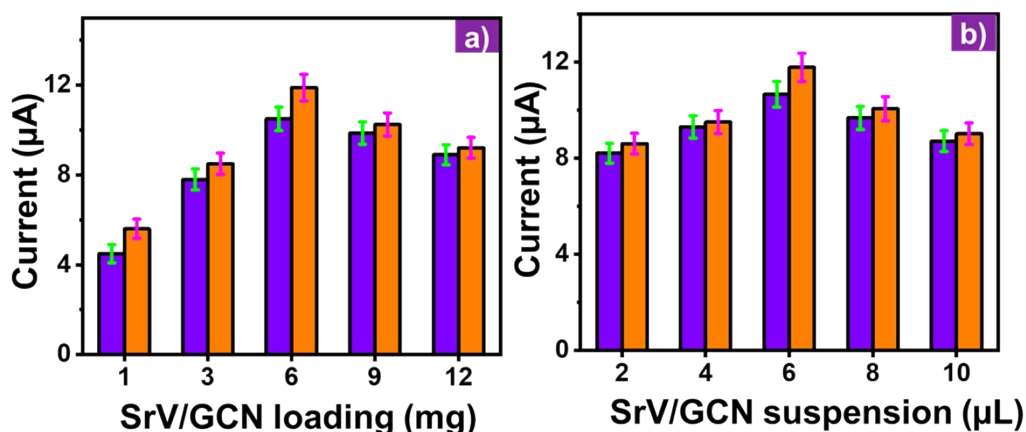

**Fig S2.** Bar chart diagram showing the electrooxidation peak current response of **a)** varying the amount of SrV/GCN (mg) deposited over GCE, **b)** The amount of SrV/GCN solution (6  $\mu\text{L}$ ) utilized to drop-cast onto GCE surface to fabricate SrV/GCN/GCE.

## **S2. Optimization of electrochemical sensing performance of SrV/GCN in different electrode surface and buffer solutions.**

The sensing performance of the SrV/GCN nanocomposite was systematically optimized in two different buffer electrolyte solutions and supporting SrV/GCN over GCE and screen-printed carbon electrode (SPCE) working electrodes. As shown in **Fig S3a**, the CV profiles of the 100  $\mu\text{M}$  of ACAMP and 100  $\mu\text{M}$  of LEV at SrV/GCN/GCE recorded in phosphate buffer solution (PBS, 0.1 M), and acetate buffer solution (ABS, 0.1 M) at a scan rate of 50  $\text{mVs}^{-1}$ . The SrV/GCN/GCE exhibited a well-defined redox peak with higher oxidation peak current response along with low  $\Delta E$  as noticed in 0.1 M PBS in comparison with the ABS electrolyte solution, suggesting the SrV/GCN/GCE exhibit efficient electrocatalytic activity toward detection of ACAMP and LEV in 0.1 M PBS (**Fig S3a**). In addition, the sensing response of the SrV/GCN was also studied by modifying SrV/GCN over different electrode surfaces such as GCE and screen-printed carbon electrode (SPCE) and CV curves were recorded in 0.1 M PBS (pH=7.0) at a scan rate of 50  $\text{mV s}^{-1}$  (**Fig S3 b**). Therefore, the GCE was utilized to modify the as-prepared SrV/GCN nanocomposite and implemented for electrochemical sensing.

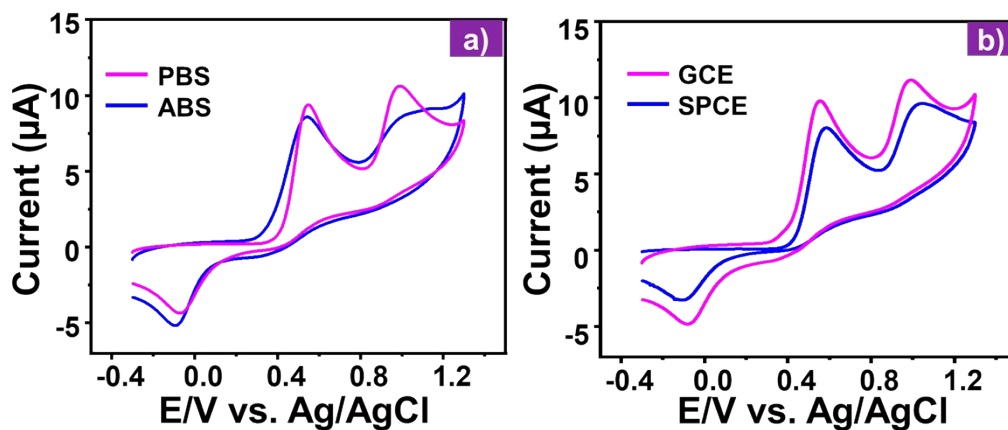

**Fig S3.** CV plots of **a)** SrV/GCN/GCE in the presence of 0.1 M of phosphate buffer solution (PBS) and acetate buffer solution (ABS) at scan rate 50 mVs<sup>-1</sup> with 100 μM addition of ACAMP and LEV. **b)** SrV/GCN modified over GCE and SPCE in the presence of 0.1 M of PBS at 50 mVs<sup>-1</sup> of scan rate with 100 μM addition of ACAMP and LEV, respectively.

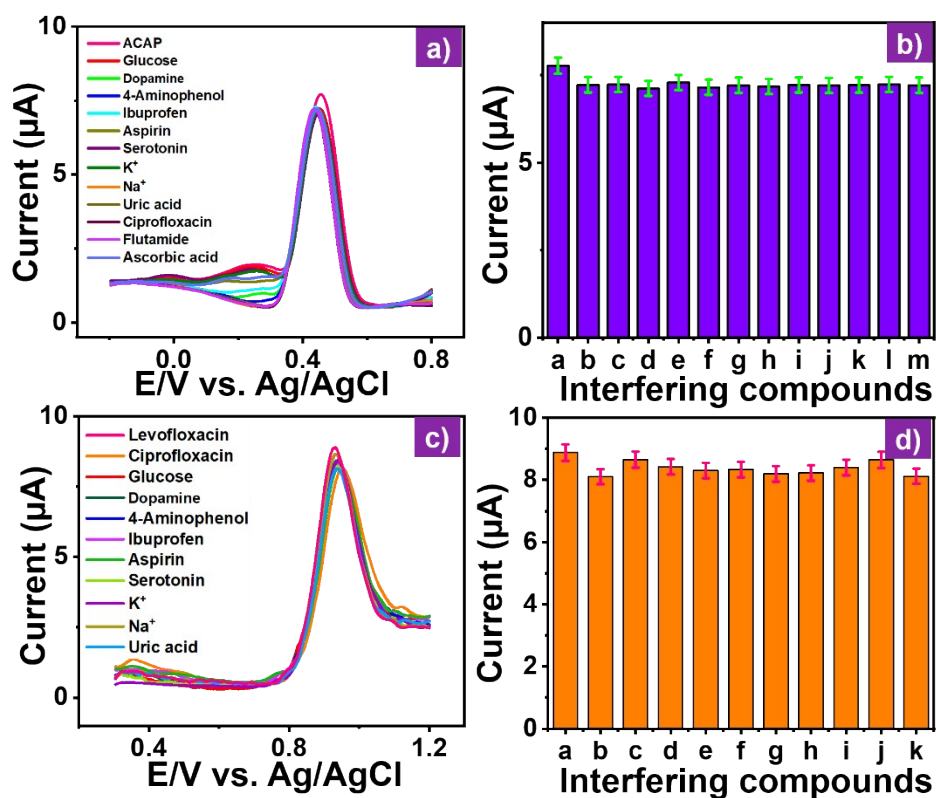

**Fig S4.** Selectivity performance of the SrV/GCN/GCE in the presence of various interference compounds. a, c) DPV curves of the 100  $\mu$ M ACAMP and LEV in the presence of various interference compounds at SrV/GCN/GCE in 0.1M PBS. b, d) corresponding bar diagram of ACAMP and LEV against various interference compounds.

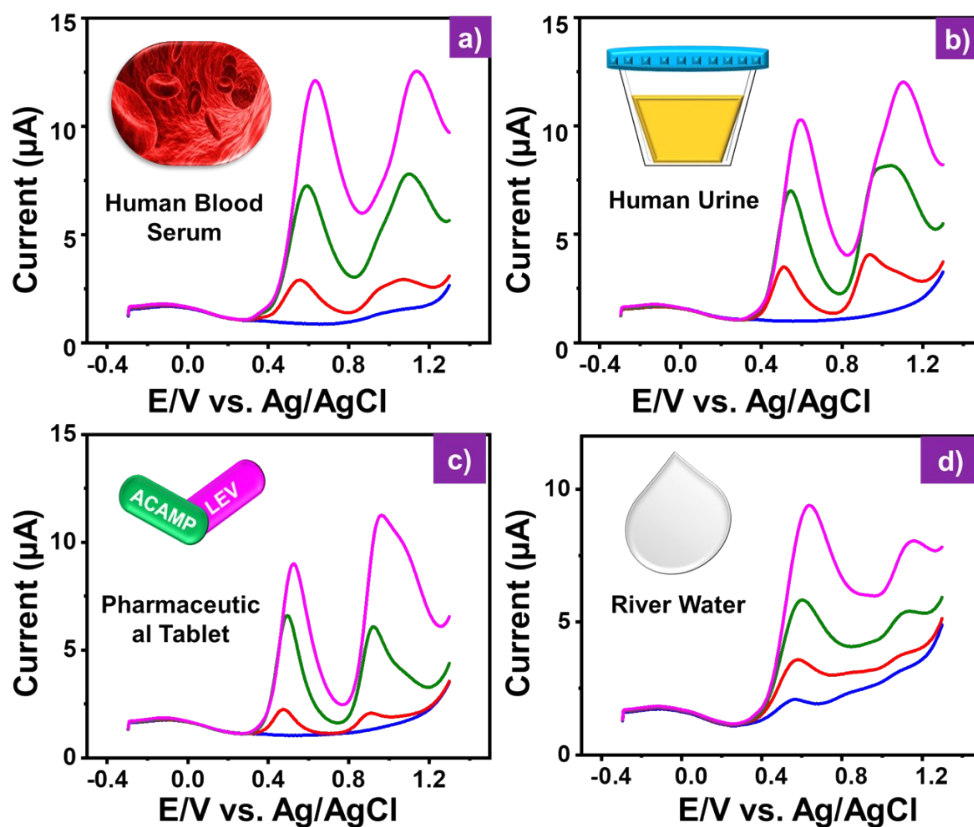

**Fig S5.** DPV response curves of SrV/GCN/GCE obtained in the presence of ACAMP and LEV in 0.1 M PBS containing **a)** human blood serum, **b)** human urine, **c)** commercial pharmaceutical tablet, and **d)** river water.

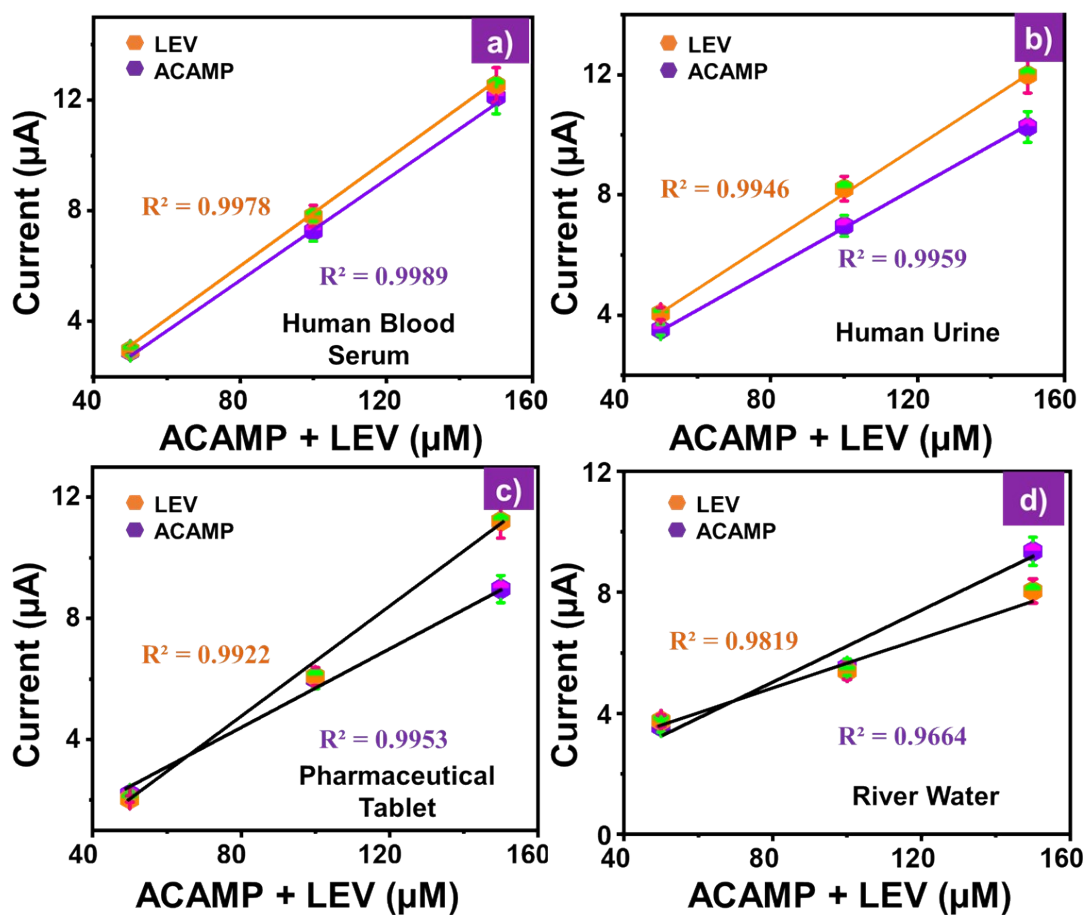

**Fig S6.** Linearity plot of current response vs. concentration of ACAMP and LEV at SrV/GCN/GCE in **a)** human blood serum, **b)** human urine, **c)** commercial pharmaceutical tablet, and **d)** river water.
